# Supplementary material for: Research on Atmospheric Temperature Fine Measurements from near surface to 60 km Altitude Based on An Integrated LIDAR System
Source: Copernicus journal article supplement (doi:10.5194/egusphere-2024-2647), 2024-10-17
Supplement: Supplementary file [file egusphere-2024-2647-AC2-supplement.pdf]

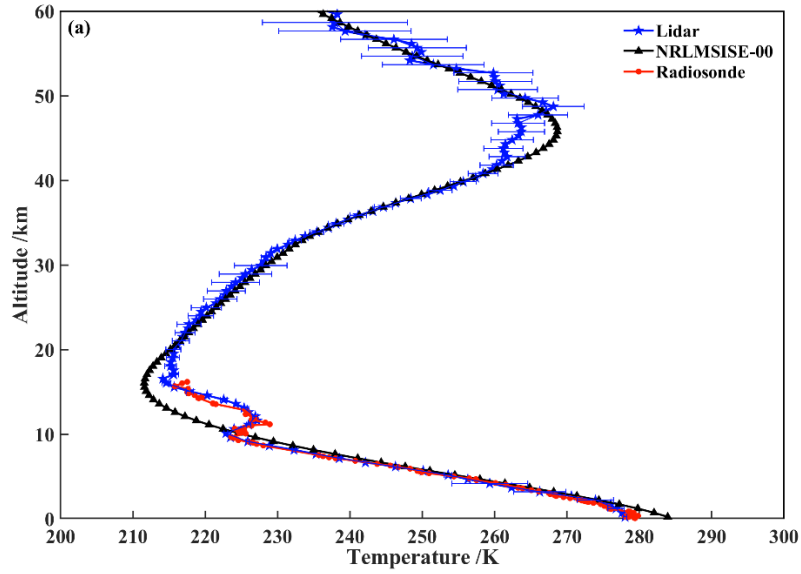

Figure 1: Single temperature profile from near surface to 60 km altitude detected by the DFOV Pure Rotational Raman-Rayleigh lidar (2024.03.10 0:30~1:30). Comparison of atmospheric temperature among lidar, radiosonde, and model. Error bars show the 1- $\sigma$  statistical uncertainty of the measurements.

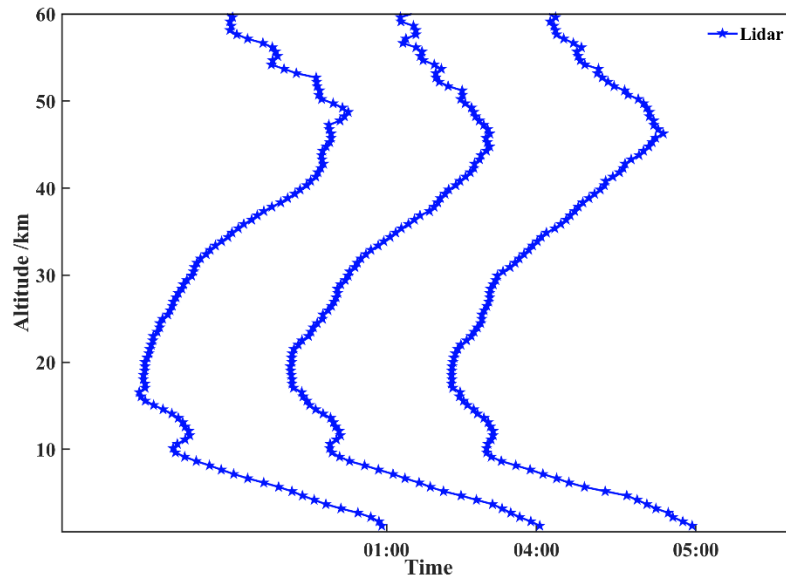

Figure 2: Time series results of atmospheric temperature profiles detected by the DFOV Pure Rotational Raman-Rayleigh lidar from near surface to 60 km altitude (2024.3.10).
